# Supplementary material for: Combined Fishing and Climate Forcing in the Southern Benguela Upwelling Ecosystem: An End-to-End Modelling Approach Reveals Dampened Effects
Source: PLoS One. 2014 Apr 7;9(4):e94286. doi: 10.1371/journal.pone.0094286 (PMC3978043; doi:10.1371/journal.pone.0094286)
Supplement: Table S2 — Equations representing the main processes in the OSMOSE model. Ni,t and Bi,t are respectively the abundance and the biomass of a school i at time t. (DOC) [file pone.0094286.s002.doc]

**Table S2: Equations representing the main processes in the OSMOSE model.** *Ni,t* and *Bi,t* are respectively the abundance and the biomass of a school *i* at time *t*.

| **Processes** | **Equations** |
| --- | --- |
| **Predation** | Successively for each school *i*, in each cell, and for prey *j* of suitable size,  With *PBi,j,t* the biomass of the school *j* preyed upon by the school *i*, *aj* the availability coefficient of the prey *j* and *r* the maximum predation rate, set for all species to 3.5g of prey per gram of body mass per year |
| **Growth** | *ΔL* is the mean growth rate calculated from the von Bertalanffy model at the appropriate length and *ΔLi,t* is the actual growth rate of the school *i* at the time step *t*. *ξi.* is the predation efficiency and corresponds to (*PBi,j,t/r Bi,t*) and *ξcrit* its critical value set for all species at 0.57 |
| **Starvation mortality** | *NS,i* is the number of fish from the school *i* which starve and die. *Mξmax* is the maximum starvation mortality rate set for all species at 1 year-1 |
| **Fishing mortality** | with F the fishing mortality rate |
| **Additional mortality** | with M the additional mortality rate |
| **Reproduction** | *N0* is the number of eggs released in the system, *Ф* is the relative fecundity  and *Amat* is the age at maturity |
